# Supplementary material
Source: PubMed Central journal article supplement (PMC3643143)
Supplement: NIHMS461180-supplement-01.pdf [file NIHMS461180-supplement-01.pdf]

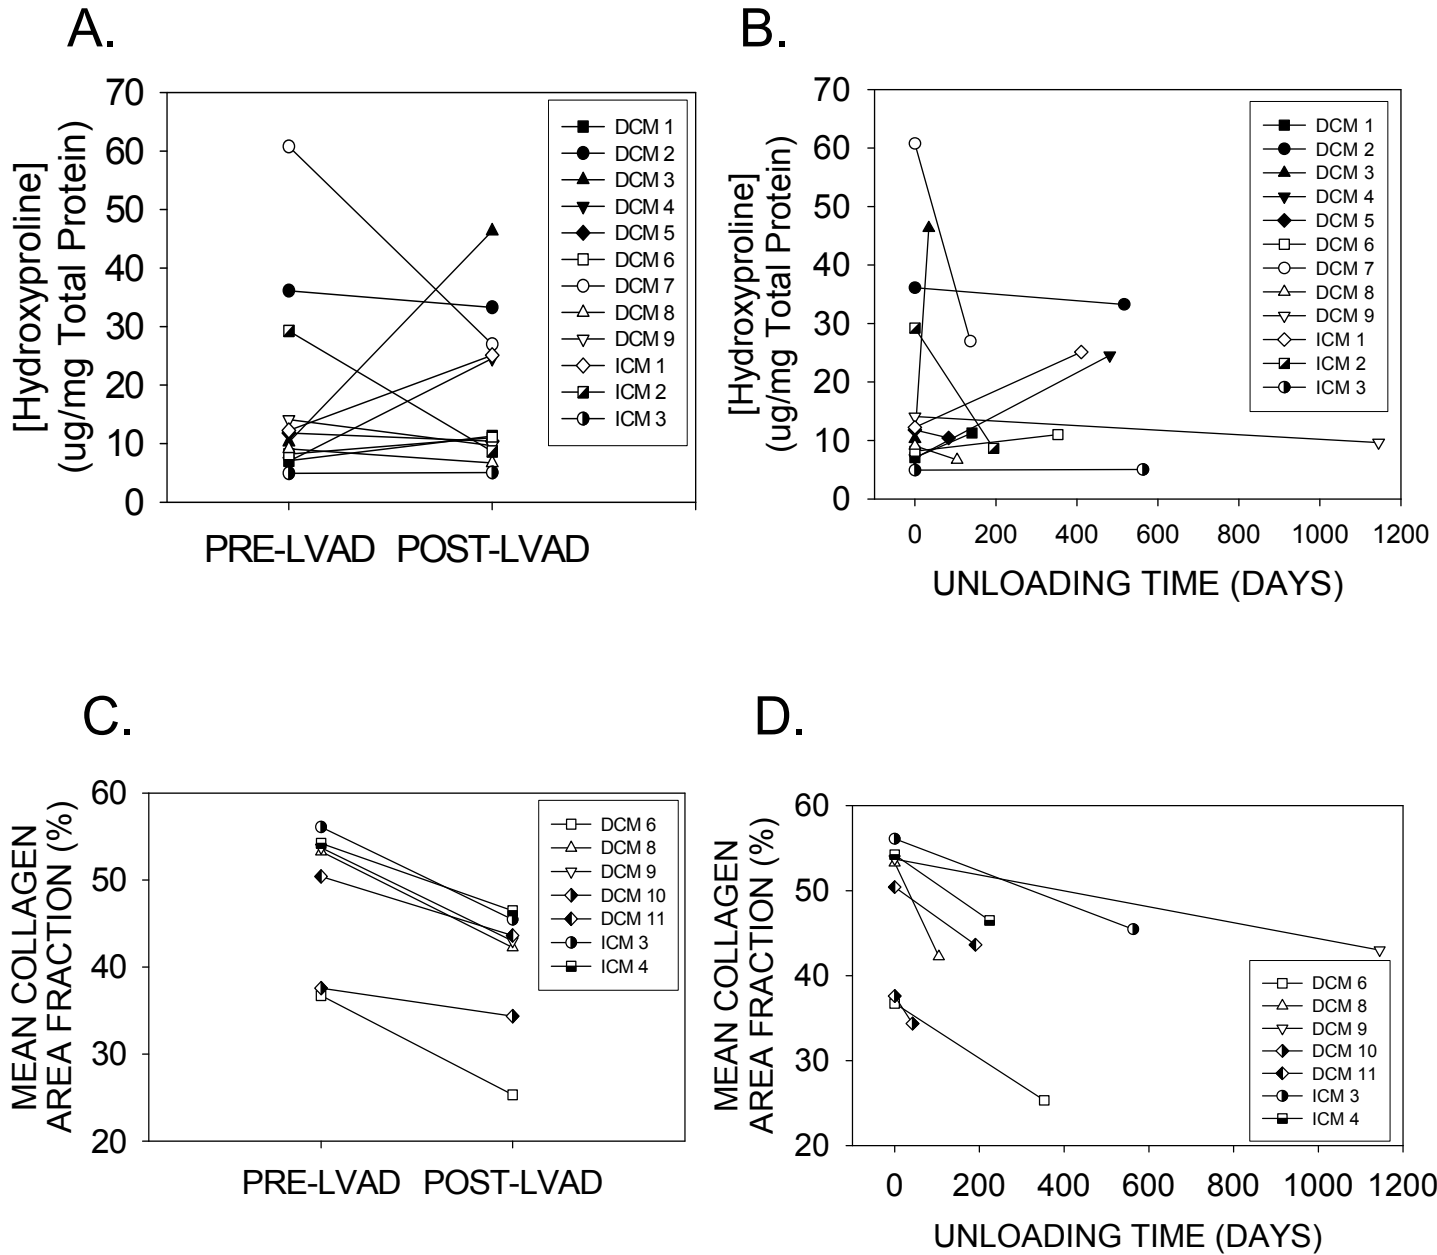

**Supplemental Figure 1.** *Fibrosis in individual, mechanically unloaded hearts.* (A) Protein-bound hydroxyproline for individual ICM and DCM patients before and after mechanical unloading. (B) Comparison of the duration of unloading vs. protein-bound hydroxyproline in individual patients. (C) Mean collagen area fraction (%) for individual ICM and DCM patients before and after mechanical unloading. (D) Comparison of mean collagen area fraction (%) vs. duration of mechanical unloading for the same 7 patients before and after mechanical unloading.

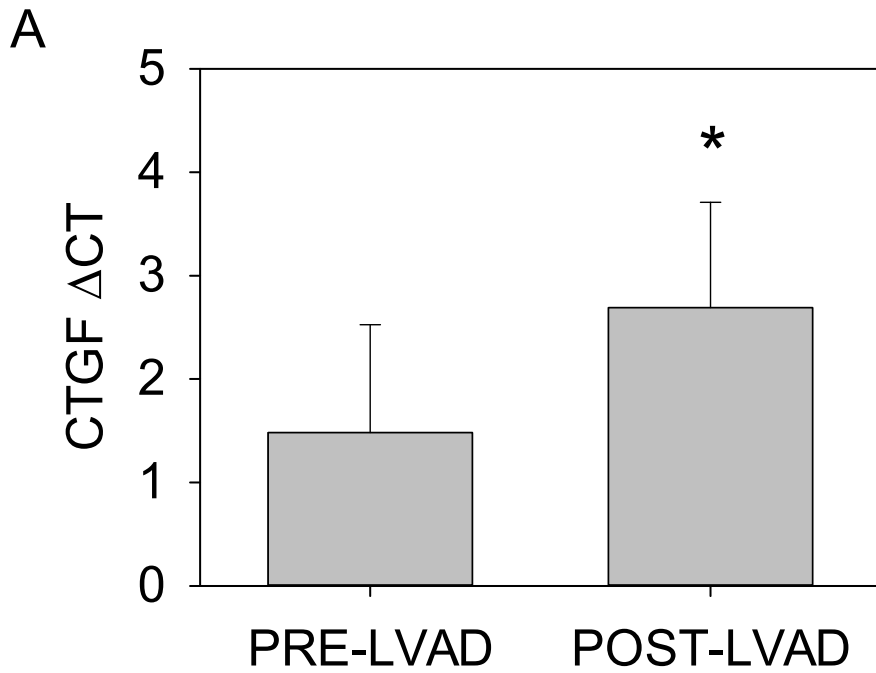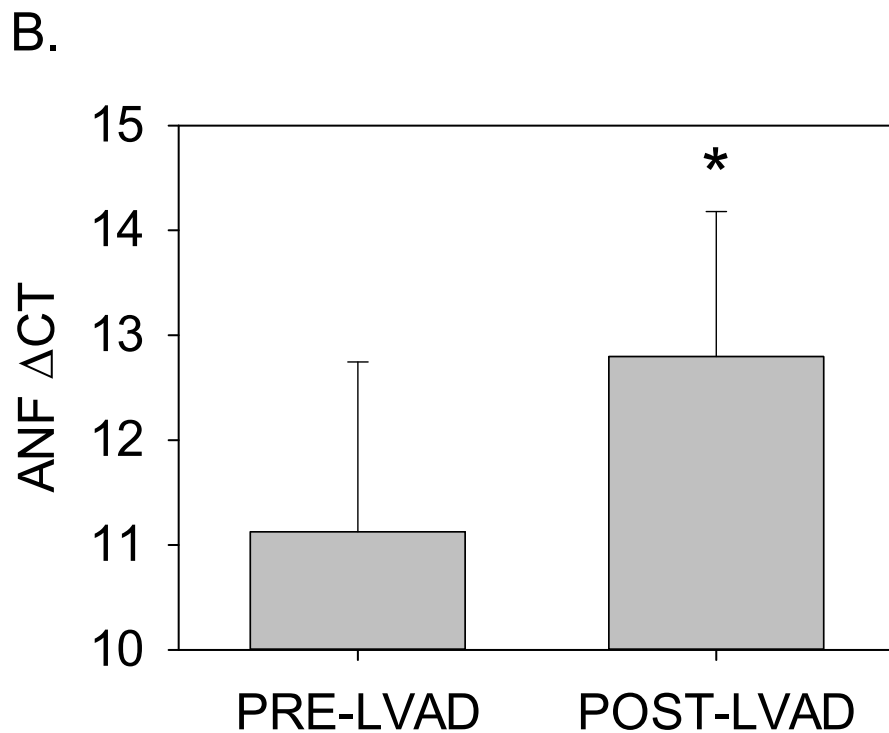

**Supplemental Figure 2.** *Fibrosis in individual, mechanically unloaded hearts.* (A)  $\Delta$ Ct values for LV CTGF mRNA (relative to 18S rRNA) derived from matched tissue samples before and after mechanical unloading, as determined by real-time RT-PCR. (B)  $\Delta$ Ct values for ANF mRNA derived from the same paired tissue samples.  $P < 0.05$ .

A.

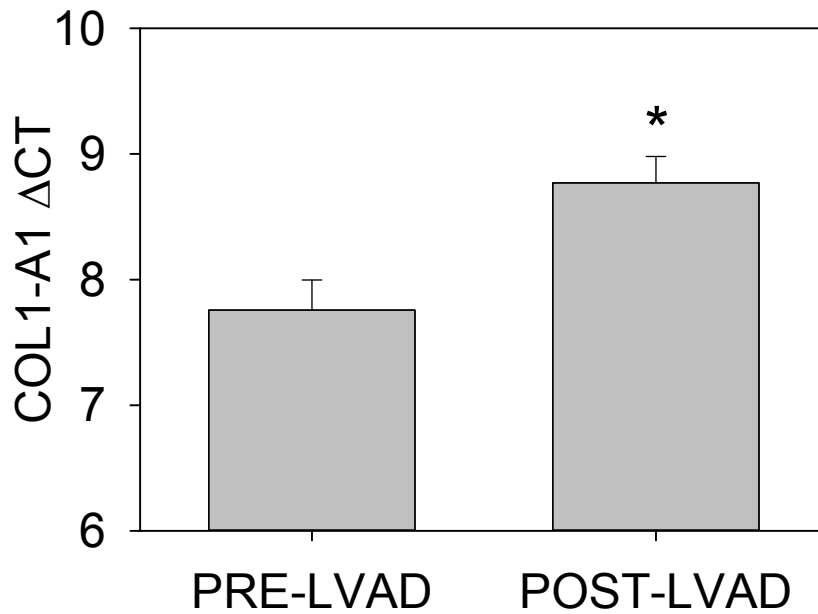

B.

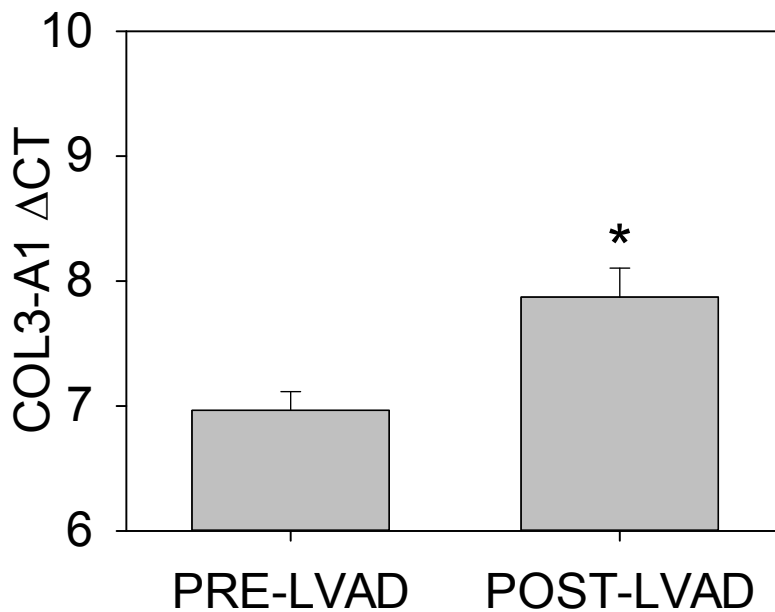

**Supplemental Figure 3.** COL1-A1 and COL3-A1 expression in mechanically unloaded hearts. (A)  $\Delta C_t$  values for LV COL1-A1 mRNA (relative to 18S rRNA) derived from matched tissue samples before and after mechanical unloading, as determined by real-time RT-PCR. (B)  $\Delta C_t$  values for COL3-A1 mRNA derived from the same paired tissue samples.
